# Supplementary material for: Type 2 diabetes is associated with loss of HDL endothelium protective functions
Source: PubMed Central journal article supplement (PMC5854245; doi:10.1371/journal.pone.0192616), 2018-03-15
Supplement: pone.0192616.s001.pdf [file pone.0192616.s001.pdf]

**Supplementary Table I. List of proteins and corresponding peptides included in targeted proteomics analysis.**

| Protein   | Peptide                | Precursor Mz | Precursor Charge | Collision Energy [NCE] |
|-----------|------------------------|--------------|------------------|------------------------|
| ALB       | FQNALLVR               | 480.78       | 2                | 15                     |
| ALB       | LVNEVTEFAK             | 575.31       | 2                | 18                     |
| APOA1     | DYVSQFEGSALGK          | 700.84       | 2                | 22                     |
| APOA1_15N | DYVSQFEGSALGK          | 708.32       | 2                | 22                     |
| APOA1     | VQPYLDDFQK             | 626.81       | 2                | 19                     |
| APOA1_15N | VQPYLDDFQK             | 633.29       | 2                | 19                     |
| APOA2     | EQLTPLIK               | 471.29       | 2                | 15                     |
| APOA2     | SPELQAEAK              | 486.75       | 2                | 15                     |
| APOA4     | LGEVNTYAGDLQK          | 704.36       | 2                | 22                     |
| APOA4     | LTPYADEFK              | 542.27       | 2                | 17                     |
| APOB      | IEIPLPFGGK             | 535.82       | 2                | 17                     |
| APOB      | SVSLPSLDPASAK          | 636.35       | 2                | 20                     |
| APOC1     | EFGNTLEDK              | 526.75       | 2                | 17                     |
| APOC1     | EWFSETFQK              | 601.28       | 2                | 19                     |
| APOC2     | TAAQNLYEK              | 519.27       | 2                | 16                     |
| APOC2     | TYLPAVDEK              | 518.27       | 2                | 16                     |
| APOC3     | DALSSVQESQVAQQAR       | 858.93       | 2                | 26                     |
| APOC3     | DYWSTVK                | 449.72       | 2                | 14                     |
| APOC4     | AWFLESK                | 440.73       | 2                | 14                     |
| APOC4     | ELLETVVNR              | 536.80       | 2                | 17                     |
| APOD      | NPNLPPETVDSLK          | 712.38       | 2                | 22                     |
| APOD      | VLNQELR                | 436.25       | 2                | 14                     |
| APOE      | AATVGSLAGQPLQER        | 749.40       | 2                | 23                     |
| APOE      | SELEEQLTPVAEETR        | 865.93       | 2                | 26                     |
| APOF      | SGVQQLIQYYQDQK         | 849.43       | 2                | 26                     |
| APOF      | SLPTEDC[+57]ENEK       | 661.28       | 2                | 20                     |
| APOH      | ATVVYQGER              | 511.77       | 2                | 16                     |
| APOH      | TC[+57]PKPDDLPFSTVVPLK | 638.67       | 3                | 27                     |
| APOL1     | LNILNNNYK              | 553.30       | 2                | 17                     |
| APOL1     | VTEPISAESGEQVER        | 815.90       | 2                | 25                     |
| APOM      | AFLLTPR                | 409.25       | 2                | 13                     |
| APOM      | SLTSC[+57]LDSK         | 505.74       | 2                | 16                     |
| C3        | TGLQEVEVK              | 501.78       | 2                | 16                     |
| C3        | TIYTPGSTVLYR           | 685.87       | 2                | 21                     |
| C4A       | GSFEFPVGDAVSK          | 670.33       | 2                | 21                     |
| C4A       | VFALDQK                | 410.73       | 2                | 13                     |
| CETP      | ASYPDITGEK             | 540.76       | 2                | 17                     |
| CETP      | VIQTAFQR               | 481.77       | 2                | 15                     |
| CLU       | ELDESLOVAER            | 644.82       | 2                | 20                     |
| CLU       | LFSDSPITVTPVEVSR       | 937.50       | 2                | 28                     |
| HPR       | LPEC[+57]EAVC[+57]GKPK | 694.34       | 2                | 21                     |
| HPR       | VVLHPNYHQVDIGLIK       | 615.68       | 3                | 26                     |

|          |                         |         |   |    |
|----------|-------------------------|---------|---|----|
| LCAT     | SSGLVSNAPGVQIR          | 692.88  | 2 | 21 |
| LCAT     | STELC[+57]GLWQGR        | 653.81  | 2 | 20 |
| LPA      | GTLSTTITGR              | 503.78  | 2 | 16 |
| LPA      | TPAYYPNAGLIK            | 654.35  | 2 | 20 |
| PCYOX1   | LFLSYDYAVK              | 609.82  | 2 | 19 |
| PCYOX1   | LVC[+57]SGLLQASK        | 588.33  | 2 | 18 |
| PLTP     | FLEQELETITIPDLR         | 908.99  | 2 | 28 |
| PLTP     | GAFFPLTER               | 519.27  | 2 | 16 |
| PON1     | IQNILTEEPK              | 592.83  | 2 | 19 |
| PON1     | STVELFK                 | 412.23  | 2 | 13 |
| PON3     | AQALEISGGFDK            | 618.32  | 2 | 19 |
| PON3     | LLNYPEDPPGSEVLR         | 906.96  | 2 | 28 |
| RBP4     | LLNLDGTC[+57]ADSYSFVFSR | 1032.99 | 2 | 31 |
| RBP4     | YWGVASFLQK              | 599.82  | 2 | 19 |
| SAA1_2   | FFGHGAEDSLADQAANEWGR    | 1089.49 | 2 | 33 |
| SAA1_2   | SFFSFLGEAFDGAR          | 775.87  | 2 | 24 |
| SAA4     | FRPDGLPK                | 465.26  | 2 | 15 |
| SAA4     | GPGGVWAAK               | 421.73  | 2 | 14 |
| SERPINA1 | LSITGTYDLK              | 555.81  | 2 | 17 |
| SERPINA1 | SVLQQLGITK              | 508.31  | 2 | 16 |
| SERPINA4 | FYYLIASETPGK            | 694.86  | 2 | 21 |
| SERPINA4 | VGSALFLSHNLK            | 643.37  | 2 | 20 |
| VDBP     | HLSLLTTLNLR             | 627.86  | 2 | 20 |
| VDBP     | VLEPTLK                 | 400.25  | 2 | 13 |
| VTN      | DVWVWIEGPIDAAFTR        | 823.91  | 2 | 25 |
| VTN      | FEDGVLDPDYPR            | 711.83  | 2 | 22 |
